# Supplementary material for: Changes in Fire Activity in Africa from 2002 to 2016 and Their Potential Drivers
Source: PubMed Central journal article supplement — Geophys Res Lett. Author manuscript; Available in PMC 2020 May 21. (PMC7241591; doi:10.1029/2019gl083469), 2019-06-27
Supplement: NIHMS1582453-supplement-Table_S-5.pdf [file NIHMS1582453-supplement-Table_S-5.pdf]

| Eco ID | Precipitation      |       |         |         |       |      |      |         | Effective rainfall |       |         |         |       |       |      |         | Soil moisture      |       |         |         |       |      |      |         |
|--------|--------------------|-------|---------|---------|-------|------|------|---------|--------------------|-------|---------|---------|-------|-------|------|---------|--------------------|-------|---------|---------|-------|------|------|---------|
|        | R <sup>2</sup> adj | β0    | β1      | β2      | R     | VIF  | DW   | p-value | R <sup>2</sup> adj | β0    | β1      | β2      | R     | VIF   | DW   | p-value | R <sup>2</sup> adj | β0    | β1      | β2      | R     | VIF  | DW   | p-value |
| 30101  | 0.25               | 10.61 | -0.0004 | -0.0112 | -0.18 | 1.17 | 1.17 | 0.04    | 0.61               | 9.53  | -0.0014 | -0.0105 | 0.05  | 3.00  | 2.21 | 0.58    | 0.50               | 13.55 | -0.0052 | -0.1354 | 0.29  | 2.35 | 2.18 | 0.55    |
| 30103  | -0.06              | 6.17  | 0.0115  | 0.0095  | 0.06  | 1.10 | 0.59 | 0.00    | -0.17              | 9.24  | 0.0010  | -0.0006 | 0.20  | 1.00  | 0.39 | 0.00    | -0.12              | 14.77 | -0.1901 | -0.0212 | -0.28 | 1.04 | 0.67 | 0.00    |
| 30108  | 0.14               | 9.11  | 0.0026  | -0.0072 | -0.21 | 1.35 | 2.21 | 0.72    | 0.13               | 8.65  | 0.0027  | -0.0047 | -0.15 | 1.34  | 2.24 | 0.72    | 0.06               | 8.42  | 0.0737  | -0.0580 | 0.08  | 1.25 | 2.29 | 0.73    |
| 30109  | 0.31               | 9.67  | -0.0058 | -0.0950 | -0.17 | 1.69 | 2.23 | 0.62    | 0.75               | 0.24  | 0.0229  | -0.0751 | 0.39  | 4.58  | 2.13 | 0.55    | 0.83               | 13.51 | 0.2992  | -0.8617 | 0.09  | 6.86 | 2.59 | 0.88    |
| 30111  | -0.12              | 8.34  | 0.0025  | -0.0008 | -0.07 | 1.04 | 1.27 | 0.05    | -0.08              | 8.52  | 0.0017  | -0.0015 | -0.12 | 1.08  | 1.04 | 0.02    | -0.09              | 8.52  | 0.0224  | -0.0215 | -0.11 | 1.07 | 1.00 | 0.02    |
| 30112  | 0.03               | 11.00 | -0.0006 | 0.0075  | -0.39 | 1.20 | 1.17 | 0.05    | -0.03              | 11.04 | -0.0031 | 0.0008  | -0.25 | 1.13  | 1.29 | 0.09    | 0.00               | 11.15 | -0.0274 | 0.0344  | -0.37 | 1.17 | 0.91 | 0.02    |
| 30114  | -0.11              | 9.61  | -0.0043 | 0.0055  | 0.60  | 1.05 | 2.23 | 0.61    | -0.17              | 9.60  | -0.0003 | 0.0001  | 0.79  | 1.00  | 2.42 | 0.72    | 0.10               | 8.62  | 0.1513  | -0.1059 | 0.46  | 1.29 | 2.30 | 0.66    |
| 30118  | 0.16               | 9.80  | 0.0151  | -0.0215 | 0.17  | 1.39 | 1.67 | 0.27    | 0.20               | 11.09 | 0.0134  | -0.0002 | 0.55  | 1.46  | 1.85 | 0.34    | 0.13               | 4.12  | 0.2216  | 0.1661  | -0.03 | 1.34 | 1.83 | 0.34    |
| 30119  | 0.45               | 7.49  | 0.0469  | -0.0370 | -0.19 | 2.13 | 1.92 | 0.43    | 0.47               | 11.25 | 0.0340  | -0.0112 | -0.12 | 2.21  | 1.80 | 0.33    | 0.21               | 2.95  | 0.3641  | 0.0078  | -0.10 | 1.47 | 1.50 | 0.14    |
| 30123  | -0.01              | 6.09  | -0.0093 | 0.0326  | 0.09  | 1.16 | 1.90 | 0.35    | -0.08              | 8.18  | -0.0148 | 0.0099  | 0.12  | 1.08  | 2.13 | 0.52    | 0.15               | 26.49 | -0.5429 | -0.1766 | -0.05 | 1.38 | 2.24 | 0.61    |
| 30124  | -0.08              | 11.34 | -0.0050 | 0.0005  | -0.29 | 1.08 | 1.69 | 0.25    | 0.04               | 10.84 | -0.0038 | 0.0000  | 0.13  | 1.21  | 1.67 | 0.20    | 0.01               | 13.21 | -0.0510 | -0.0212 | 0.35  | 1.18 | 1.72 | 0.25    |
| 30125  | 0.02               | 9.19  | 0.0100  | 0.0006  | 0.42  | 1.19 | 1.72 | 0.27    | 0.12               | 10.46 | 0.0082  | -0.0024 | 0.42  | 1.33  | 1.84 | 0.35    | 0.19               | 8.97  | 0.1311  | -0.0764 | 0.25  | 1.45 | 1.84 | 0.36    |
| 30128  | 0.12               | 11.62 | -0.0057 | -0.0085 | 0.00  | 1.32 | 2.04 | 0.45    | 0.31               | 9.76  | -0.0001 | -0.0092 | -0.05 | 1.68  | 2.09 | 0.47    | 0.39               | 11.95 | 0.0422  | -0.1338 | 0.09  | 1.92 | 1.87 | 0.33    |
| 30202  | -0.14              | 10.28 | -0.0003 | -0.0049 | 0.09  | 1.03 | 2.31 | 0.72    | -0.14              | 10.05 | 0.0018  | -0.0015 | 0.23  | 1.03  | 2.27 | 0.70    | -0.08              | 8.79  | 0.0949  | -0.0266 | -0.07 | 1.08 | 2.13 | 0.57    |
| 30203  | -0.10              | 9.63  | 0.0021  | -0.0122 | 0.09  | 1.06 | 1.40 | 0.10    | -0.07              | 10.03 | 0.0010  | 0.0008  | 0.76  | 1.09  | 1.35 | 0.06    | -0.03              | 9.10  | 0.0250  | 0.0300  | 0.52  | 1.13 | 1.42 | 0.09    |
| 30701  | -0.12              | 13.31 | 0.0013  | -0.0081 | 0.04  | 1.04 | 1.76 | 0.29    | -0.05              | 13.22 | 0.0000  | -0.0011 | 0.77  | 1.11  | 1.87 | 0.35    | -0.14              | 13.35 | 0.0093  | -0.0110 | 0.49  | 1.02 | 1.83 | 0.33    |
| 30702  | 0.28               | 8.15  | 0.0360  | 0.0578  | 0.07  | 1.62 | 1.64 | 0.17    | 0.07               | 17.02 | 0.0010  | 0.0330  | 0.66  | 1.25  | 1.67 | 0.24    | 0.23               | 4.73  | 0.2412  | 0.2193  | 0.56  | 1.52 | 1.58 | 0.19    |
| 30704  | 0.35               | 14.42 | -0.0050 | -0.0063 | -0.37 | 1.79 | 1.36 | 0.08    | 0.52               | 13.45 | -0.0015 | -0.0023 | 0.53  | 2.41  | 1.88 | 0.38    | 0.54               | 15.57 | -0.0426 | -0.0472 | 0.31  | 2.52 | 1.84 | 0.33    |
| 30705  | 0.25               | 15.27 | -0.0093 | -0.0028 | 0.10  | 1.57 | 0.67 | 0.00    | 0.92               | 13.78 | -0.0036 | -0.0012 | 0.72  | 15.10 | 2.19 | 0.53    | 0.87               | 16.77 | -0.0836 | -0.0356 | 0.48  | 8.78 | 1.65 | 0.16    |
| 30706  | 0.19               | 13.13 | 0.0041  | -0.0954 | 0.54  | 1.44 | 2.95 | 0.97    | 0.30               | 11.85 | 0.0050  | -0.0091 | 0.35  | 1.66  | 2.45 | 0.82    | 0.57               | 13.07 | 0.0772  | -0.1416 | -0.09 | 2.70 | 2.39 | 0.83    |
| 30707  | 0.09               | 14.34 | -0.0110 | -0.0020 | 0.39  | 1.28 | 1.16 | 0.03    | 0.23               | 12.62 | -0.0039 | -0.0042 | 0.59  | 1.52  | 1.47 | 0.13    | 0.02               | 16.30 | -0.0661 | -0.0872 | 0.17  | 1.19 | 1.09 | 0.03    |
| 30708  | 0.25               | 8.60  | 0.0001  | 0.0043  | -0.17 | 1.55 | 1.73 | 0.31    | 0.02               | 8.87  | -0.0007 | 0.0018  | 0.45  | 1.19  | 2.28 | 0.70    | 0.12               | 8.36  | -0.0149 | 0.0370  | 0.42  | 1.32 | 2.23 | 0.66    |
| 30709  | 0.20               | 10.49 | 0.0423  | -0.0114 | 0.26  | 1.45 | 1.08 | 0.02    | 0.30               | 16.46 | 0.0189  | 0.0068  | 0.63  | 1.67  | 1.41 | 0.10    | 0.47               | 8.22  | 0.5293  | -0.3684 | 0.58  | 2.21 | 1.01 | 0.02    |
| 30711  | 0.16               | 8.70  | 0.0274  | 0.0066  | -0.34 | 1.39 | 2.11 | 0.65    | 0.16               | 12.77 | 0.0147  | 0.0038  | -0.22 | 1.38  | 2.12 | 0.64    | 0.21               | 5.43  | 0.2082  | 0.0985  | -0.03 | 1.49 | 2.37 | 0.78    |
| 30712  | 0.29               | 14.79 | -0.0096 | 0.0001  | 0.25  | 1.64 | 1.21 | 0.03    | 0.72               | 13.56 | -0.0034 | -0.0008 | 0.70  | 4.21  | 1.88 | 0.31    | 0.67               | 16.30 | -0.0735 | -0.0265 | 0.63  | 3.54 | 1.80 | 0.27    |
| 30713  | -0.10              | 13.30 | -0.0041 | -0.0168 | 0.05  | 1.06 | 1.93 | 0.39    | 0.08               | 11.47 | -0.0054 | -0.0013 | 0.64  | 1.27  | 2.10 | 0.49    | 0.04               | 14.26 | -0.1160 | -0.0038 | 0.46  | 1.22 | 1.87 | 0.33    |
| 30714  | 0.06               | 5.43  | 0.0295  | 0.0268  | -0.25 | 1.24 | 1.81 | 0.41    | 0.02               | 11.10 | 0.0108  | 0.0216  | 0.03  | 1.19  | 1.61 | 0.22    | -0.01              | 2.59  | 0.1175  | 0.2220  | 0.20  | 1.16 | 1.58 | 0.21    |
| 30715  | -0.03              | 7.89  | 0.0309  | 0.0189  | -0.58 | 1.14 | 1.74 | 0.37    | -0.01              | 13.29 | 0.0142  | 0.0081  | -0.58 | 1.15  | 1.70 | 0.32    | -0.05              | 5.52  | 0.1565  | 0.1162  | -0.42 | 1.11 | 1.65 | 0.29    |
| 30716  | 0.48               | 11.05 | 0.0109  | -0.0164 | -0.08 | 2.26 | 1.45 | 0.14    | 0.70               | 10.24 | 0.0088  | -0.0162 | 0.24  | 3.85  | 2.06 | 0.54    | 0.55               | 11.80 | 0.1604  | -0.2223 | 0.40  | 2.59 | 2.61 | 0.88    |
| 30717  | -0.06              | 9.39  | 0.0236  | 0.0582  | -0.23 | 1.10 | 1.43 | 0.12    | 0.15               | 12.03 | 0.0218  | -0.0087 | 0.35  | 1.38  | 1.59 | 0.19    | 0.17               | 7.12  | 0.4296  | -0.2882 | 0.49  | 1.40 | 1.48 | 0.11    |
| 30718  | 0.38               | 13.72 | -0.0015 | -0.0086 | 0.17  | 1.89 | 1.11 | 0.03    | 0.58               | 12.73 | 0.0002  | -0.0036 | 0.55  | 2.75  | 2.24 | 0.61    | 0.63               | 14.82 | -0.0116 | -0.0649 | 0.38  | 3.14 | 1.77 | 0.27    |
| 30719  | 0.22               | 11.74 | 0.0069  | -0.0073 | -0.18 | 1.50 | 2.85 | 0.94    | 0.34               | 12.03 | 0.0058  | -0.0045 | 0.41  | 1.78  | 2.80 | 0.94    | 0.32               | 10.75 | 0.1072  | -0.0284 | 0.36  | 1.73 | 2.71 | 0.90    |
| 30721  | 0.10               | 11.05 | 0.0016  | -0.0047 | 0.00  | 1.30 | 1.42 | 0.14    | 0.20               | 10.70 | 0.0016  | -0.0031 | 0.06  | 1.46  | 1.40 | 0.11    | 0.29               | 11.12 | 0.0388  | -0.0542 | 0.23  | 1.65 | 1.34 | 0.09    |
| 30722  | 0.53               | 14.49 | -0.0113 | -0.0054 | 0.16  | 2.46 | 1.19 | 0.04    | 0.53               | 12.82 | -0.0029 | -0.0025 | 0.44  | 2.46  | 1.18 | 0.03    | 0.55               | 15.17 | -0.0590 | -0.0467 | 0.55  | 2.58 | 1.18 | 0.03    |
| 30723  | -0.07              | 12.39 | 0.0027  | -0.0017 | 0.20  | 1.09 | 1.94 | 0.40    | -0.13              | 12.58 | -0.0009 | -0.0004 | 0.41  | 1.03  | 1.91 | 0.35    | -0.16              | 12.77 | -0.0062 | -0.0010 | 0.39  | 1.00 | 1.89 | 0.35    |
| 30724  | 0.15               | 10.02 | 0.0064  | 0.0039  | -0.43 | 1.37 | 1.24 | 0.04    | 0.11               | 10.95 | 0.0010  | 0.0017  | 0.52  | 1.31  | 1.35 | 0.06    | 0.16               | 9.68  | 0.0330  | 0.0310  | 0.22  | 1.39 | 1.40 | 0.08    |
| 30725  | 0.29               | 11.50 | 0.0169  | -0.0245 | -0.39 | 1.64 | 1.34 | 0.06    | 0.36               | 13.64 | 0.0115  | -0.0005 | 0.38  | 1.82  | 1.02 | 0.02    | 0.48               | 7.29  | 0.2252  | 0.1369  | 0.13  | 2.23 | 1.13 | 0.03    |
| 30726  | 0.02               | 12.81 | 0.0032  | -0.2125 | 0.61  | 1.19 | 1.56 | 0.15    | -0.10              | 12.14 | 0.0023  | -0.0057 | 0.88  | 1.06  | 1.46 | 0.11    | -0.15              | 12.79 | 0.0144  | -0.0050 | 0.61  | 1.01 | 1.47 | 0.12    |
| 30904  | -0.02              | 7.85  | -0.0273 | 0.0083  | -0.33 | 1.15 | 1.08 | 0.04    | 0.23               | 2.53  | -0.0195 | -0.0002 | 0.09  | 1.51  | 1.35 | 0.07    | 0.22               | 11.97 | -0.4055 | 0.0144  | -0.14 | 1.49 | 1.39 | 0.11    |
| 30905  | 0.25               | 13.18 | -0.0057 | 0.0020  | 0.40  | 1.55 | 2.71 | 0.91    | 0.10               | 12.59 | -0.0016 | -0.0001 | 0.84  | 1.29  | 2.72 | 0.89    | 0.17               | 13.48 | -0.0065 | -0.0287 | 0.74  | 1.40 | 2.73 | 0.89    |
| 30906  | -0.10              | 10.23 | -0.0026 | -0.0070 | 0.01  | 1.06 | 2.24 | 0.57    | -0.08              | 9.25  | -0.0016 | -0.0038 | -0.06 | 1.08  | 2.18 | 0.60    | 0.13               | 12.04 | -0.0283 | -0.0838 | 0.08  | 1.35 | 2.06 | 0.49    |
| 30907  | 0.28               | 12.82 | -0.0105 | -0.0102 | -0.57 | 1.63 | 1.86 | 0.28    | 0.38               | 11.09 | -0.0032 | -0.0031 | 0.24  | 1.87  | 1.97 | 0.38    | 0.32               | 13.56 | -0.0638 | -0.0440 | 0.05  | 1.72 | 1.96 | 0.41    |
| 30908  | 0.23               | 3.41  | 0.0894  | 0.1776  | -0.41 | 1.51 | 2.56 | 0.88    | 0.40               | 23.44 | 0.0457  | 0.0439  | 0.26  | 1.96  | 2.69 | 0.93    | 0.38               | -4.45 | 0.7524  | 0.3462  | 0.46  | 1.89 | 2.06 | 0.58    |
| 31001  | 0.40               | 9.67  | 0.0030  | 0.0044  | 0.08  | 1.96 | 1.74 | 0.33    | -0.06              | 10.17 | -0.0014 | 0.0008  | 0.23  | 1.10  | 1.02 | 0.01    | 0.10               | 9.39  | 0.0118  | 0.0287  | 0.26  | 1.29 | 1.14 | 0.04    |
| 31002  | 0.21               | 9.51  | 0.0122  | -0.0132 | 0.14  | 1.47 | 1.86 | 0.40    | 0.08               | 9.60  | 0.0060  | -0.0082 | 0.36  | 1.27  | 1.90 | 0.43    | 0.01               | 8.77  | 0.0919  | -0.0117 | 0.54  | 1.18 | 1.88 | 0.34    |
| 31003  | -0.15              | 8.41  | 0.0028  | 0.0015  | 0.12  | 1.01 | 2.65 | 0.90    | -0.14              | 8.70  | 0.0019  | 0.0015  | 0.19  | 1.03  | 2.75 | 0.93    | -0.03              | 6.97  | 0.0501  | 0.0196  | 0.17  | 1.13 | 2.76 | 0.93    |
| 31004  | 0.58               | 8.33  | 0.0490  | -0.0026 | -0.16 | 2.81 | 1.99 | 0.44    | 0.81               | 12.29 | 0.0271  | -0.0048 | 0.07  | 6.19  | 1.55 | 0.15    | 0.72               | 4.67  | 0.3456  | -0.0119 | 0.00  | 4.18 | 0.92 | 0.01    |
| 31007  | 0.05               | 8.30  | 0.0029  | 0.0121  | -0.31 | 1.23 | 1.68 | 0.27    | -0.06              | 9.22  | -0.0010 | 0.0035  | -0.25 | 1.10  | 1.48 | 0.18    | 0.02               | 7.59  | -0.0002 | 0.0667  | -0.33 | 1.19 | 1.34 | 0.13    |
| 31009  | 0.17               | 8.67  | 0.0373  | -0.0173 | 0.31  | 1.40 | 1.99 | 0.01    | 0.42               | 11.84 | 0.0245  | -0.0062 | 0.37  | 2.02  | 1.29 | 0.06    | 0.07               | 7.00  | 0.1937  | -0.0168 | 0.22  | 1.25 | 1.47 | 0.13    |
| 31010  | 0.11               | 9.44  | -0.0230 | 0.0158  | -0.07 | 1.32 | 1.17 | 0.03    |                    |       |         |         |       |       |      |         |                    |       |         |         |       |      |      |         |
