# Supplementary material for: Changes in Fire Activity in Africa from 2002 to 2016 and Their Potential Drivers
Source: PubMed Central journal article supplement — Geophys Res Lett. Author manuscript; Available in PMC 2020 May 21. (PMC7241591; doi:10.1029/2019gl083469), 2019-06-27
Supplement: NIHMS1582453-supplement-Table_S-6.pdf [file NIHMS1582453-supplement-Table_S-6.pdf]

| Precipitation |                    |       |         |         |       |      |      |         | Effective rainfall |                    |       |         |         |       |      |      |         | Soil moisture |                    |       |         |         |       |      |      |         |
|---------------|--------------------|-------|---------|---------|-------|------|------|---------|--------------------|--------------------|-------|---------|---------|-------|------|------|---------|---------------|--------------------|-------|---------|---------|-------|------|------|---------|
| Eco ID        | R <sup>2</sup> adj | β0    | β1      | β2      | R     | VIF  | DW   | p-value | Eco ID             | R <sup>2</sup> adj | β0    | β1      | β2      | R     | VIF  | DW   | p-value | Eco ID        | R <sup>2</sup> adj | β0    | β1      | β2      | R     | VIF  | DW   | p-value |
| 30101         | 0.27               | 10.45 | -0.0110 | -0.0091 | -0.38 | 1.59 | 2.59 | 0.86    | 30101              | 0.59               | 8.46  | -0.0065 | -0.0075 | -0.11 | 2.83 | 3.24 | 0.99    | 30101         | 0.65               | 14.05 | -0.0820 | -0.1156 | 0.03  | 3.35 | 2.89 | 0.94    |
| 30104         | -0.06              | 8.84  | 0.0033  | -0.0122 | 0.26  | 1.10 | 1.17 | 0.03    | 30104              | 0.05               | 7.40  | 0.0156  | -0.0047 | 0.47  | 1.22 | 1.34 | 0.05    | 30104         | 0.03               | -1.66 | 0.4293  | -0.0924 | 0.48  | 1.21 | 1.26 | 0.04    |
| 30108         | 0.01               | 6.12  | 0.0113  | 0.0007  | 0.34  | 1.18 | 2.38 | 0.78    | 30108              | 0.02               | 7.36  | 0.0077  | 0.0013  | 0.35  | 1.19 | 2.37 | 0.78    | 30108         | 0.07               | 4.15  | 0.1469  | -0.0051 | 0.31  | 1.25 | 2.33 | 0.76    |
| 30109         | 0.49               | 6.36  | 0.0297  | -0.0247 | -0.04 | 2.28 | 1.60 | 0.20    | 30109              | 0.63               | 7.24  | 0.0239  | -0.0238 | 0.08  | 3.18 | 1.42 | 0.11    | 30109         | 0.79               | 8.39  | 0.4004  | -0.4557 | -0.02 | 5.61 | 1.54 | 0.17    |
| 30111         | 0.28               | 9.65  | -0.0101 | -0.0356 | 0.21  | 1.61 | 2.49 | 0.81    | 30111              | 0.20               | 4.72  | -0.0045 | -0.0212 | -0.01 | 1.45 | 2.21 | 0.64    | 30111         | 0.30               | 12.46 | 0.0009  | -0.2927 | -0.04 | 1.66 | 2.24 | 0.67    |
| 30112         | 0.13               | 7.35  | -0.0025 | 0.0176  | -0.39 | 1.33 | 2.19 | 0.65    | 30112              | 0.13               | 8.32  | -0.0038 | 0.0073  | -0.25 | 1.34 | 1.91 | 0.45    | 30112         | 0.27               | 6.07  | -0.0363 | 0.1345  | -0.37 | 1.60 | 1.62 | 0.28    |
| 30117         | 0.33               | 10.57 | 0.0010  | -0.0090 | -0.30 | 1.73 | 1.70 | 0.31    | 30117              | 0.37               | 9.58  | 0.0001  | -0.0085 | -0.26 | 1.85 | 1.87 | 0.43    | 30117         | 0.47               | 18.67 | -0.0427 | -0.3460 | -0.06 | 2.18 | 2.39 | 0.77    |
| 30118         | 0.34               | 9.69  | 0.0084  | -0.0189 | -0.19 | 1.76 | 2.46 | 0.85    | 30118              | 0.24               | 9.07  | 0.0106  | -0.0115 | 0.22  | 1.53 | 2.44 | 0.83    | 30118         | 0.23               | 2.56  | 0.5227  | -0.2297 | 0.54  | 1.52 | 2.16 | 0.66    |
| 30119         | 0.10               | 6.08  | 0.0368  | -0.0071 | -0.08 | 1.30 | 1.69 | 0.29    | 30119              | 0.23               | 9.78  | 0.0278  | -0.0051 | 0.04  | 1.51 | 1.95 | 0.46    | 30119         | 0.25               | 4.04  | 0.3823  | -0.1707 | 0.01  | 1.55 | 1.73 | 0.28    |
| 30124         | 0.00               | 11.62 | -0.0196 | 0.0034  | 0.12  | 1.17 | 1.92 | 0.38    | 30124              | -0.05              | 9.38  | -0.0069 | 0.0033  | 0.33  | 1.11 | 1.81 | 0.24    | 30124         | -0.16              | 9.29  | 0.0248  | -0.0217 | 0.57  | 1.00 | 2.01 | 0.42    |
| 30125         | 0.39               | 8.11  | 0.0141  | -0.0069 | 0.03  | 1.92 | 1.77 | 0.31    | 30125              | 0.42               | 9.18  | 0.0094  | -0.0039 | 0.06  | 2.00 | 1.96 | 0.44    | 30125         | 0.44               | 7.00  | 0.1647  | -0.0668 | 0.04  | 2.09 | 1.77 | 0.31    |
| 30126         | 0.23               | 11.78 | -0.0021 | -0.0223 | -0.06 | 1.52 | 1.62 | 0.26    | 30126              | 0.25               | 9.04  | 0.0009  | -0.0174 | -0.06 | 1.55 | 1.77 | 0.36    | 30126         | 0.08               | 12.02 | 0.0549  | -0.1726 | -0.06 | 1.27 | 1.90 | 0.45    |
| 30128         | 0.02               | 11.67 | -0.0172 | -0.0015 | -0.09 | 1.19 | 1.49 | 0.17    | 30128              | -0.10              | 9.54  | -0.0068 | -0.0015 | 0.11  | 1.06 | 1.61 | 0.21    | 30128         | 0.04               | 13.75 | -0.1514 | -0.0509 | 0.31  | 1.21 | 1.44 | 0.12    |
| 30129         | -0.11              | 6.25  | 0.0035  | 0.0105  | 0.26  | 1.06 | 1.58 | 0.14    | 30129              | -0.04              | 7.96  | -0.0010 | 0.0114  | 0.44  | 1.12 | 1.70 | 0.21    | 30129         | -0.10              | 3.46  | 0.0415  | 0.1202  | 0.36  | 1.06 | 1.49 | 0.12    |
| 30130         | -0.10              | 6.13  | 0.0116  | -0.0058 | 0.21  | 1.06 | 1.67 | 0.24    | 30130              | -0.06              | 7.62  | 0.0076  | 0.0050  | 0.40  | 1.10 | 1.59 | 0.16    | 30130         | -0.07              | 2.97  | 0.0940  | 0.1110  | 0.21  | 1.09 | 1.62 | 0.19    |
| 30202         | 0.33               | 11.32 | -0.0118 | -0.1358 | 0.02  | 1.74 | 1.81 | 0.32    | 30202              | 0.21               | 7.62  | -0.0074 | -0.0116 | 0.29  | 1.47 | 1.86 | 0.37    | 30202         | -0.08              | 10.95 | 0.0023  | -0.1279 | -0.08 | 1.08 | 1.88 | 0.37    |
| 30203         | 0.25               | 10.65 | -0.0101 | -0.0206 | -0.17 | 1.56 | 2.26 | 0.65    | 30203              | 0.27               | 6.97  | 0.0002  | -0.0127 | 0.59  | 1.59 | 2.16 | 0.54    | 30203         | -0.05              | 11.13 | -0.0417 | -0.1058 | 0.75  | 1.12 | 2.12 | 0.51    |
| 30701         | 0.14               | 12.61 | 0.0043  | -0.0094 | 0.10  | 1.36 | 1.56 | 0.16    | 30701              | -0.15              | 12.62 | 0.0009  | -0.0010 | 0.72  | 1.02 | 1.21 | 0.04    | 30701         | -0.15              | 12.56 | -0.0027 | 0.0146  | 0.46  | 1.02 | 1.50 | 0.13    |
| 30702         | 0.52               | 4.33  | 0.1003  | 0.5139  | 0.30  | 2.44 | 1.20 | 0.04    | 30702              | 0.36               | 6.34  | 0.0503  | -0.0489 | 0.72  | 1.82 | 1.57 | 0.12    | 30702         | 0.38               | -1.20 | 0.8405  | -0.2460 | 0.75  | 1.88 | 1.45 | 0.13    |
| 30704         | 0.00               | 13.60 | -0.0032 | -0.0052 | -0.05 | 1.16 | 1.50 | 0.18    | 30704              | -0.05              | 13.11 | -0.0010 | -0.0007 | 0.79  | 1.11 | 1.69 | 0.24    | 30704         | -0.08              | 13.94 | -0.0239 | -0.0095 | 0.45  | 1.08 | 1.73 | 0.26    |
| 30706         | 0.25               | 13.06 | -0.0018 | -0.0147 | -0.61 | 1.55 | 1.12 | 0.06    | 30706              | 0.20               | 11.97 | 0.0019  | -0.0056 | -0.41 | 1.47 | 1.23 | 0.10    | 30706         | 0.31               | 13.67 | 0.0262  | -0.1124 | -0.52 | 1.70 | 1.38 | 0.17    |
| 30708         | -0.06              | 7.75  | -0.0036 | -0.0034 | -0.11 | 1.10 | 1.68 | 0.29    | 30708              | -0.08              | 7.22  | -0.0015 | -0.0009 | 0.68  | 1.08 | 1.69 | 0.28    | 30708         | 0.02               | 7.83  | -0.0591 | 0.0594  | 0.47  | 1.18 | 1.61 | 0.20    |
| 30711         | 0.26               | 4.84  | 0.0391  | 0.0046  | -0.31 | 1.58 | 1.75 | 0.36    | 30711              | 0.21               | 9.87  | 0.0203  | 0.0021  | -0.16 | 1.48 | 1.69 | 0.30    | 30711         | 0.28               | 0.74  | 0.3128  | 0.0753  | 0.04  | 1.61 | 2.07 | 0.55    |
| 30712         | 0.04               | 11.87 | -0.0104 | 0.0014  | 0.05  | 1.22 | 1.31 | 0.05    | 30712              | 0.45               | 10.45 | -0.0043 | -0.0015 | 0.68  | 2.12 | 1.60 | 0.14    | 30712         | 0.48               | 14.39 | -0.1057 | -0.0439 | 0.56  | 2.26 | 1.61 | 0.14    |
| 30714         | 0.09               | 2.01  | 0.0845  | -0.2524 | 0.35  | 1.28 | 1.92 | 0.46    | 30714              | -0.05              | 11.54 | 0.0188  | 0.0350  | 0.56  | 1.11 | 1.49 | 0.16    | 30714         | 0.06               | -0.89 | 0.5944  | -0.3515 | 0.54  | 1.24 | 1.44 | 0.13    |
| 30716         | 0.21               | 7.94  | 0.0139  | -0.0138 | -0.21 | 1.48 | 1.31 | 0.13    | 30716              | 0.38               | 7.24  | 0.0102  | -0.0175 | 0.23  | 1.90 | 2.02 | 0.57    | 30716         | 0.68               | 9.94  | 0.1872  | -0.3335 | 0.38  | 3.62 | 1.86 | 0.39    |
| 30717         | -0.14              | 7.74  | 0.0074  | -0.0139 | 0.28  | 1.02 | 1.30 | 0.06    | 30717              | 0.08               | 8.04  | 0.0166  | -0.0130 | 0.46  | 1.26 | 1.26 | 0.05    | 30717         | 0.13               | 5.95  | 0.4144  | -0.3488 | 0.66  | 1.35 | 1.10 | 0.02    |
| 30718         | 0.16               | 12.25 | -0.0001 | -0.0086 | 0.19  | 1.39 | 1.51 | 0.14    | 30718              | 0.54               | 11.46 | 0.0002  | -0.0038 | 0.50  | 2.55 | 2.24 | 0.57    | 30718         | 0.58               | 13.24 | -0.0045 | -0.0613 | 0.36  | 2.78 | 1.67 | 0.19    |
| 30719         | 0.15               | 11.65 | 0.0001  | -0.0741 | 0.08  | 1.38 | 2.65 | 0.89    | 30719              | -0.08              | 10.56 | 0.0013  | -0.0065 | 0.40  | 1.08 | 2.17 | 0.61    | 30719         | -0.13              | 11.70 | 0.0071  | -0.0427 | 0.10  | 1.03 | 2.17 | 0.60    |
| 30721         | 0.04               | 8.94  | -0.0023 | -0.0079 | 0.15  | 1.21 | 1.58 | 0.19    | 30721              | 0.10               | 7.87  | 0.0014  | -0.0073 | 0.24  | 1.30 | 1.60 | 0.18    | 30721         | 0.01               | 10.49 | -0.0079 | -0.1010 | 0.20  | 1.18 | 1.79 | 0.29    |
| 30723         | -0.12              | 11.59 | 0.0009  | -0.0026 | -0.29 | 1.04 | 1.57 | 0.17    | 30723              | -0.10              | 11.57 | -0.0012 | -0.0007 | 0.39  | 1.06 | 1.59 | 0.16    | 30723         | -0.01              | 12.14 | -0.0020 | -0.0286 | 0.31  | 1.16 | 1.86 | 0.32    |
| 30724         | -0.05              | 9.51  | 0.0046  | 0.0006  | -0.11 | 1.11 | 1.12 | 0.04    | 30724              | -0.17              | 9.94  | 0.0001  | -0.0001 | 0.12  | 1.00 | 1.36 | 0.08    | 30724         | -0.12              | 9.82  | 0.0288  | -0.0183 | 0.17  | 1.05 | 1.25 | 0.05    |
| 30725         | 0.13               | 10.14 | 0.0076  | 0.0276  | 0.25  | 1.33 | 2.04 | 0.50    | 30725              | 0.12               | 12.25 | 0.0056  | 0.0054  | 0.11  | 1.32 | 1.92 | 0.44    | 30725         | 0.19               | 7.79  | 0.1018  | 0.1152  | -0.26 | 1.44 | 2.00 | 0.53    |
| 30726         | -0.13              | 9.73  | 0.0028  | -0.0390 | 0.56  | 1.03 | 1.19 | 0.03    | 30726              | -0.04              | 10.11 | 0.0028  | -0.0008 | 0.87  | 1.12 | 1.33 | 0.07    | 30726         | -0.02              | 9.21  | 0.0495  | 0.0031  | 0.61  | 1.14 | 1.21 | 0.04    |
| 30906         | 0.14               | 8.98  | -0.0047 | -0.0274 | 0.01  | 1.35 | 2.11 | 0.47    | 30906              | 0.04               | 6.66  | -0.0045 | -0.0076 | -0.06 | 1.22 | 1.76 | 0.28    | 30906         | 0.24               | 12.23 | -0.0921 | -0.1193 | 0.08  | 1.54 | 1.97 | 0.42    |
| 30907         | 0.15               | 10.47 | -0.0040 | -0.0532 | -0.18 | 1.37 | 1.88 | 0.35    | 30907              | 0.16               | 8.59  | 0.0019  | -0.0087 | 0.79  | 1.38 | 1.95 | 0.41    | 30907         | 0.07               | 11.01 | -0.0133 | -0.0755 | 0.40  | 1.26 | 2.02 | 0.45    |
| 31001         | -0.09              | 8.14  | 0.0029  | 0.0113  | 0.01  | 1.07 | 1.42 | 0.17    | 31001              | -0.16              | 8.60  | -0.0003 | 0.0007  | 0.54  | 1.00 | 1.29 | 0.06    | 31001         | 0.13               | 7.41  | -0.0174 | 0.1443  | 0.56  | 1.35 | 1.20 | 0.04    |
| 31002         | -0.05              | 7.37  | 0.0070  | 0.0086  | 0.16  | 1.11 | 1.46 | 0.14    | 31002              | -0.16              | 8.10  | 0.0007  | 0.0012  | 0.39  | 1.01 | 1.59 | 0.21    | 31002         | -0.15              | 7.54  | 0.0085  | 0.0154  | 0.53  | 1.02 | 1.56 | 0.16    |
| 31004         | 0.16               | 7.12  | 0.0257  | -0.0263 | 0.10  | 1.38 | 1.47 | 0.12    | 31004              | 0.38               | 8.29  | 0.0174  | -0.0141 | 0.19  | 1.88 | 1.42 | 0.10    | 31004         | 0.58               | 5.08  | 0.2879  | -0.1463 | 0.16  | 2.79 | 1.64 | 0.22    |
| 31006         | -0.04              | 7.20  | -0.0004 | -0.0737 | 0.20  | 1.12 | 2.75 | 0.94    | 31006              | 0.01               | 4.15  | 0.0024  | -0.0250 | 0.20  | 1.18 | 2.44 | 0.81    | 31006         | 0.30               | 9.48  | 0.0812  | -0.3317 | 0.02  | 1.67 | 2.10 | 0.56    |
| 31014         | -0.06              | 6.71  | 0.0080  | -0.0401 | -0.44 | 1.10 | 2.14 | 0.58    | 31014              | -0.09              | 6.14  | 0.0052  | -0.0100 | -0.31 | 1.07 | 2.20 | 0.65    | 31014         | -0.05              | 5.47  | 0.1347  | -0.0834 | 0.11  | 1.12 | 2.14 | 0.62    |
| 31015         | -0.11              | 7.31  | 0.0056  | 0.1069  | 0.13  | 1.05 | 3.15 | 1.00    | 31015              | 0.26               | 6.02  | 0.0131  | -0.0199 | 0.18  | 1.57 | 2.34 | 0.79    | 31015         | 0.42               | 8.28  | 0.1509  | -0.2663 | -0.43 | 2.03 | 2.59 | 0.90    |
| 31203         | 0.00               | 3.94  | 0.1065  | -0.0071 | -0.31 | 1.17 | 2.00 | 0.52    | 31203              | 0.01               | 12.34 | 0.0610  | -0.0068 | 0.05  | 1.17 | 2.17 | 0.64    | 31203         | -0.10              | 5.71  | 0.2285  | -0.1588 | -0.21 | 1.06 | 2.40 | 0.76    |
| 31311         | -0.12              | 7.02  | 0.0104  | 0.0180  | -0.13 | 1.04 | 0.76 | 0.00    | 31311              | 0.13               | 3.31  | 0.0087  | -0.0367 | 0.28  | 1.34 | 0.54 | 0.00    | 31311         | -0.12              | 7.42  | 0.1472  | -0.1677 | 0.32  | 1.04 | 0.69 | 0.00    |
| 31312         | -0.09              | 8.66  | 0.0048  | -0.0018 | -0.36 | 1.07 | 2.16 | 0.67    | 31312              | -0.05              | 8.98  | 0.0034  | -0.0017 | -0.25 | 1.11 | 2.14 | 0.64    | 31312         | -0.04              | 7.22  | 0.1200  | -0.0113 | -0.14 | 1.12 | 2.07 | 0.59    |
| 31316         | 0.24               | 1.02  | 0.1392  | 0.2196  | 0.05  | 1.53 | 1.56 |         |                    |                    |       |         |         |       |      |      |         |               |                    |       |         |         |       |      |      |         |
